# Supplementary material for: Solar Tracking System with New Hybrid Control in Energy Production Optimization from Photovoltaic Conversion for Polish Climatic Conditions
Source: MDPI journal article supplement (doi:10.3390/en14102938), 2021-05-19
Supplement: s1 [file s1]

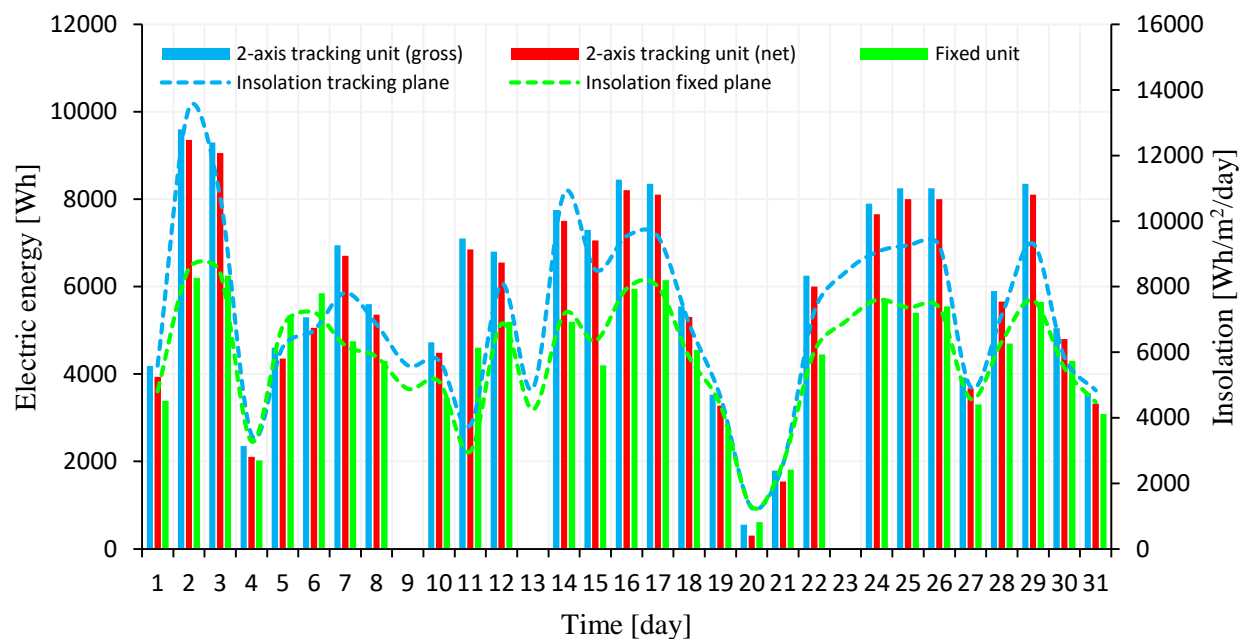

**Figure S1.** Variability of the electricity production and the determined insolation for photovoltaic modules in the fixed and dual-axis tracking configurations in August 2016.

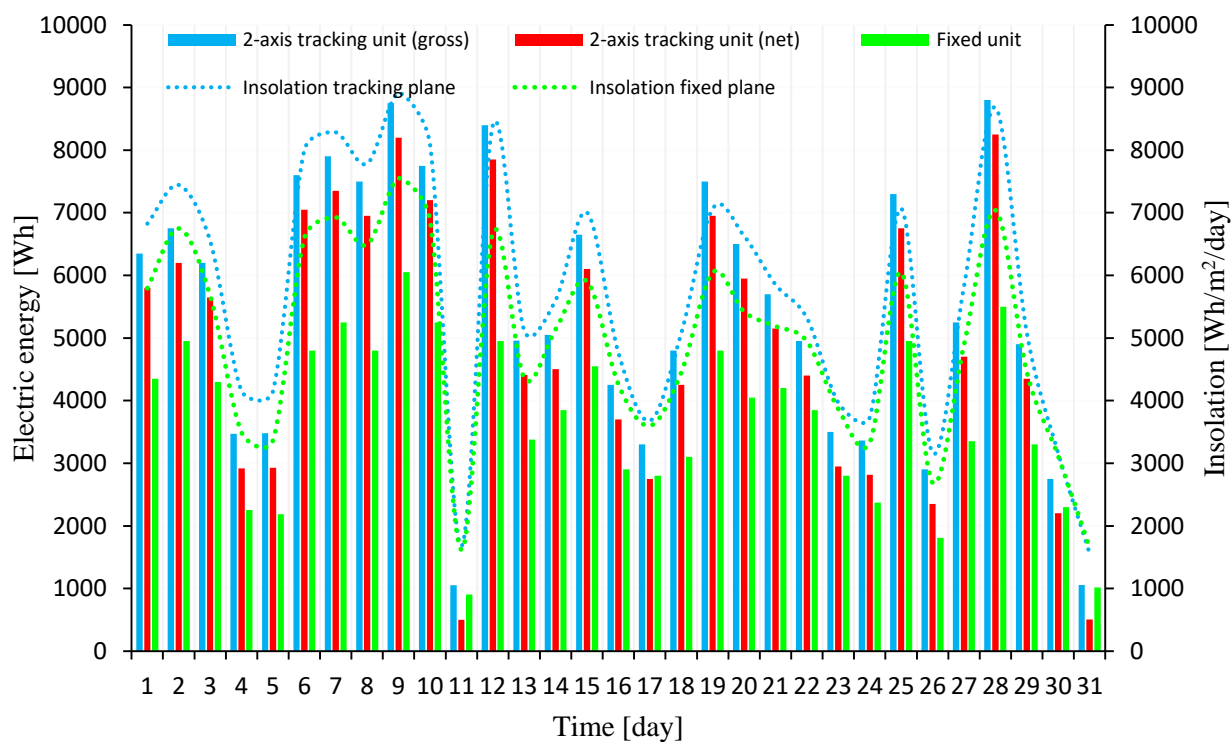

**Figure S2.** Variability of the electricity production and the determined insolation for photovoltaic modules in the fixed and dual-axis tracking configurations in August 2017.

**Table S1.** Values of RMSE% and MBE% for tested models.

|          |    |       | <u>L</u> | <u>H</u> | <u>B</u> | <u>T</u> | <u>K</u> | <u>M</u> |           |        |        | <u>L</u> | <u>H</u> | <u>B</u> | <u>T</u> | <u>K</u> | <u>M</u> |
|----------|----|-------|----------|----------|----------|----------|----------|----------|-----------|--------|--------|----------|----------|----------|----------|----------|----------|
| January  | 30 | RMSE% | 5.035    | 8.030    | 12.869   | 19.716   | 8.688    | 3.975    | July      |        | 5.571  | 5.502    | 10.942   | 15.438   | 4.277    | 4.259    |          |
|          |    | MBE%  | -2.133   | -1.237   | -6.438   | -10.036  | -2.453   | 1.571    |           |        | -2.790 | -2.185   | -7.408   | -10.853  | -0.756   | 0.859    |          |
|          |    |       |          |          |          |          |          |          |           |        |        |          |          |          |          |          |          |
|          |    |       |          |          |          |          |          |          |           |        |        |          |          |          |          |          |          |
|          | 45 | RMSE% | 10.205   | 12.736   | 24.887   | 25.135   | 10.238   | 4.904    |           | 10.039 | 9.585  | 20.353   | 20.372   | 6.303    | 6.245    |          |          |
|          |    | MBE%  | -4.714   | -3.306   | -12.461  | -12.666  | -2.934   | -1.096   |           | -5.932 | -5.129 | -14.216  | -14.227  | -1.363   | -1.518   |          |          |
|          |    |       |          |          |          |          |          |          |           |        |        |          |          |          |          |          |          |
|          |    |       |          |          |          |          |          |          |           |        |        |          |          |          |          |          |          |
|          | 60 | RMSE% | 17.004   | 18.657   | 34.978   | 29.101   | 12.488   | 11.095   |           | 15.051 | 14.760 | 28.619   | 23.853   | 7.657    | 9.803    |          |          |
|          |    | MBE%  | -8.103   | -6.489   | -17.603  | -14.497  | -3.784   | -4.740   |           | -9.930 | -9.484 | -20.468  | -16.871  | -2.439   | -5.411   |          |          |
|          |    |       |          |          |          |          |          |          |           |        |        |          |          |          |          |          |          |
|          |    |       |          |          |          |          |          |          |           |        |        |          |          |          |          |          |          |
| February | 30 | RMSE% | 3.256    | 6.497    | 8.596    | 13.367   | 3.572    | 4.989    | August    |        | 2.930  | 3.044    | 8.395    | 12.516   | 1.685    | 2.666    |          |
|          |    | MBE%  | -0.744   | 1.702    | -4.585   | -7.325   | 0.670    | 2.053    |           |        | -1.716 | 0.054    | -5.647   | -8.465   | -0.186   | 1.343    |          |
|          |    |       |          |          |          |          |          |          |           |        |        |          |          |          |          |          |          |
|          |    |       |          |          |          |          |          |          |           |        |        |          |          |          |          |          |          |
|          | 45 | RMSE% | 5.546    | 7.727    | 15.866   | 15.866   | 4.834    | 4.457    |           | 5.538  | 4.602  | 15.497   | 15.497   | 2.493    | 2.366    |          |          |
|          |    | MBE%  | -2.217   | 0.966    | -8.700   | -8.700   | 0.861    | 0.547    |           | -3.521 | -1.282 | -10.511  | -10.511  | -0.232   | -0.378   |          |          |
|          |    |       |          |          |          |          |          |          |           |        |        |          |          |          |          |          |          |
|          |    |       |          |          |          |          |          |          |           |        |        |          |          |          |          |          |          |
|          | 60 | RMSE% | 8.805    | 8.753    | 21.479   | 17.069   | 5.945    | 5.717    |           | 9.037  | 7.277  | 21.329   | 17.172   | 3.536    | 3.605    |          |          |
|          |    | MBE%  | -4.246   | -0.588   | -11.872  | -9.347   | 0.008    | -1.543   |           | -5.917 | -3.486 | -14.501  | -11.648  | -0.194   | -1.760   |          |          |
|          |    |       |          |          |          |          |          |          |           |        |        |          |          |          |          |          |          |
|          |    |       |          |          |          |          |          |          |           |        |        |          |          |          |          |          |          |
| March    | 30 | RMSE% | 2.447    | 4.286    | 7.546    | 11.543   | 2.956    | 2.403    | September |        | 2.296  | 2.941    | 8.702    | 13.450   | 1.356    | 1.399    |          |
|          |    | MBE%  | -1.233   | 1.410    | -4.475   | -6.796   | -1.070   | 1.244    |           |        | -1.178 | 1.450    | -5.416   | -8.458   | 0.470    | 0.658    |          |
|          |    |       |          |          |          |          |          |          |           |        |        |          |          |          |          |          |          |
|          |    |       |          |          |          |          |          |          |           |        |        |          |          |          |          |          |          |
|          | 45 | RMSE% | 4.004    | 5.152    | 13.453   | 13.450   | 2.554    | 1.441    |           | 5.362  | 2.803  | 16.735   | 16.746   | 2.103    | 2.429    |          |          |
|          |    | MBE%  | -2.365   | 1.020    | -7.948   | -7.944   | -0.420   | 0.090    |           | -3.042 | 0.261  | -10.461  | -10.471  | 0.461    | -0.841   |          |          |
|          |    |       |          |          |          |          |          |          |           |        |        |          |          |          |          |          |          |
|          |    |       |          |          |          |          |          |          |           |        |        |          |          |          |          |          |          |
|          | 60 | RMSE% | 6.648    | 5.993    | 17.857   | 14.076   | 3.128    | 3.062    |           | 9.604  | 5.168  | 23.255   | 29.517   | 3.024    | 6.240    |          |          |
|          |    | MBE%  | -3.824   | 0.024    | -10.505  | -8.282   | 0.271    | -1.336   |           | -5.640 | -2.088 | -14.473  | -14.944  | 0.337    | -3.400   |          |          |
|          |    |       |          |          |          |          |          |          |           |        |        |          |          |          |          |          |          |
|          |    |       |          |          |          |          |          |          |           |        |        |          |          |          |          |          |          |
| April    | 30 | RMSE% | 6.529    | 5.795    | 11.356   | 15.407   | 6.224    | 5.517    | October   |        | 4.338  | 2.771    | 12.960   | 19.151   | 1.248    | 0.787    |          |
|          |    | MBE%  | -3.386   | -1.691   | -7.386   | -10.300  | -2.771   | -0.207   |           |        | -2.451 | -1.587   | -7.431   | -11.006  | -0.537   | -0.044   |          |
|          |    |       |          |          |          |          |          |          |           |        |        |          |          |          |          |          |          |
|          |    |       |          |          |          |          |          |          |           |        |        |          |          |          |          |          |          |
|          | 45 | RMSE% | 10.355   | 8.487    | 19.596   | 19.640   | 8.324    | 7.620    |           | 9.466  | 7.388  | 24.631   | 24.631   | 2.444    | 1.652    |          |          |
|          |    | MBE%  | -5.963   | -3.710   | -13.082  | -13.114  | -3.721   | -2.809   |           | -5.415 | -4.276 | -14.160  | -14.160  | -1.294   | -0.793   |          |          |
|          |    |       |          |          |          |          |          |          |           |        |        |          |          |          |          |          |          |
|          |    |       |          |          |          |          |          |          |           |        |        |          |          |          |          |          |          |
|          | 60 | RMSE% | 14.705   | 10.014   | 26.469   | 22.330   | 10.347   | 11.166   |           | 16.122 | 13.734 | 34.259   | 28.234   | 4.060    | 3.115    |          |          |
|          |    |       |          |          |          |          |          |          |           |        |        |          |          |          |          |          |          |

|     |      |       |        |        |         |         |        |        |          |        |          |         |         |        |         |        |       |
|-----|------|-------|--------|--------|---------|---------|--------|--------|----------|--------|----------|---------|---------|--------|---------|--------|-------|
|     |      | MBE%  | -9.092 | -6.023 | -17.821 | -14.896 | -4.145 | -5.876 |          | -9.269 | -7.943   | -19.698 | -16.246 | -2.275 | -1.736  |        |       |
|     |      |       |        |        |         |         |        |        |          |        |          |         |         |        |         |        |       |
|     |      |       |        |        |         |         |        |        |          |        |          |         |         |        |         |        |       |
| May | 30   | RMSE% | 6.214  | 6.096  | 10.320  | 14.061  | 5.434  | 4.631  | November | 4.480  | 10.613   | 13.472  | 20.194  | 8.898  | 4.223   |        |       |
|     |      | MBE%  | -2.779 | -2.652 | -6.768  | -9.726  | -1.092 | 0.014  |          | -1.971 | -4.127   | -6.648  | -10.039 | -0.582 | 1.777   |        |       |
|     |      |       |        |        |         |         |        |        |          |        |          |         |         |        |         |        |       |
|     | 45   | RMSE% | 9.724  | 9.725  | 18.146  | 18.142  | 8.004  | 7.283  |          | 9.421  | 17.036   | 25.362  | 25.362  | 9.329  | 3.442   |        |       |
|     |      | MBE%  | -4.986 | -4.987 | -12.416 | -12.414 | -1.633 | -1.690 |          | -4.508 | -7.314   | -12.616 | -12.784 | -0.602 | -0.917  |        |       |
|     |      |       |        |        |         |         |        |        |          |        |          |         |         |        |         |        |       |
|     | 60   | RMSE% | 13.908 | 13.909 | 24.862  | 20.957  | 10.471 | 10.253 |          | 16.038 | 29.373   | 34.994  | 28.660  | 6.145  | 9.292   |        |       |
|     |      | MBE%  | -7.979 | -7.980 | -17.228 | -14.147 | -2.006 | -3.729 |          | -7.869 | -10.816  | -17.440 | -14.259 | -1.866 | -4.341  |        |       |
|     |      |       |        |        |         |         |        |        |          |        |          |         |         |        |         |        |       |
|     |      |       |        |        |         |         |        |        |          |        |          |         |         |        |         |        |       |
|     | June | 30    | RMSE%  | 6.355  | 6.346   | 10.054  | 13.789 | 6.458  |          | 6.103  | December | 5.473   | 5.465   | 16.104 | 23.892  | 2.231  | 1.875 |
|     |      |       | MBE%   | -0.793 | -0.038  | -5.184  | -8.335 | 1.180  |          | 2.425  |          | -2.503  | -2.502  | -7.666 | -11.344 | -0.537 | 1.141 |
|     |      |       |        |        |         |         |        |        |          |        |          |         |         |        |         |        |       |
| 45  |      | RMSE% | 10.342 | 23.744 | 18.338  | 18.350  | 9.178  | 8.561  | 11.927   | 11.924 |          | 30.559  | 30.584  | 4.681  | 3.161   |        |       |
|     |      | MBE%  | -2.516 | -5.646 | -10.570 | -10.543 | 1.288  | 1.023  | -5.577   | -5.575 |          | -14.560 | -14.566 | -1.077 | -0.554  |        |       |
|     |      |       |        |        |         |         |        |        |          |        |          |         |         |        |         |        |       |
| 60  |      | RMSE% | 14.073 | 15.306 | 25.393  | 21.287  | 10.902 | 10.426 | 14.828   | 14.828 |          | 30.884  | 25.615  | 4.895  | 3.993   |        |       |
|     |      | MBE%  | -5.758 | -0.312 | -15.847 | -12.489 | 0.729  | -2.276 | -6.994   | -6.994 |          | -14.691 | -12.190 | -1.771 | -1.260  |        |       |
|     |      |       |        |        |         |         |        |        |          |        |          |         |         |        |         |        |       |
|     |      |       |        |        |         |         |        |        |          |        |          |         |         |        |         |        |       |

L (Liu – Jordan model), H (Hay model), B (Badescu model), T (Tian model), K (Koronakis model), M (proposed model)
